# Supplementary material for: Black phosphorus–polypyrrole nanocomposites for high-performance photothermal cancer therapy
Source: Royal Society of Chemistry journal article supplement (doi:10.1039/c9nj01249d), 2019-01-01
Supplement: c9nj01249d1.pdf [file c9nj01249d1.pdf]

## Electronic Supplementary Information

### **Black phosphorus nanosheet-polypyrrole nanocomposites for high-performance photothermal cancer therapy**

Chengkang Su,<sup>#a</sup> Huiqing Zhong,<sup>#a</sup> Haolin Chen,<sup>b</sup> Yanxian Guo,<sup>a</sup> Zhouyi Guo,<sup>a</sup> Deqiu Huang,<sup>a</sup> Wen Zhang,<sup>a</sup> Qiang Wu,<sup>\*c</sup> Biwen Yang<sup>d</sup> and Zhiming Liu<sup>\*a</sup>

a. MOE Key Laboratory of Laser Life Science & SATCM Third Grade Laboratory of Chinese Medicine and Photonics Technology, College of Biophotonics, South China Normal University, Guangzhou 510631, Guangdong, China. E-mail: liuzm021@126.com

b. Key Laboratory of Sensing Technology and Biomedical Instrument of Guangdong Province, School of Biomedical Engineering, Sun Yat-sen University, Guangzhou, Guangdong 510006, P. R. China.

c. Faculty of Engineering and Environment, Northumbria University, Newcastle NE1 8ST, UK. E-mail: qiang.wu@northumbria.ac.uk

d. Guangzhou Micro-shot Technology Co., Ltd, Guangzhou 510640, Guangdong, China.

<sup>#</sup>These authors contributed equally to this work.

## Supplementary Figures

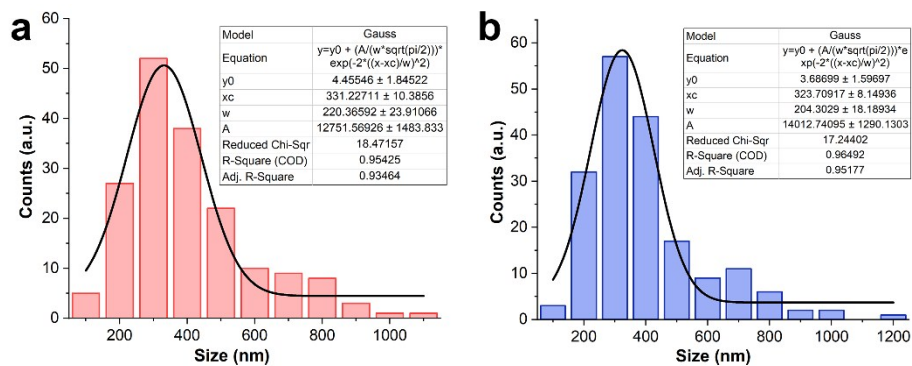

Fig. S1 Flake lateral length histograms of BP NSs (a) and BP/PPy NSs (b), calculated from the TEM images.

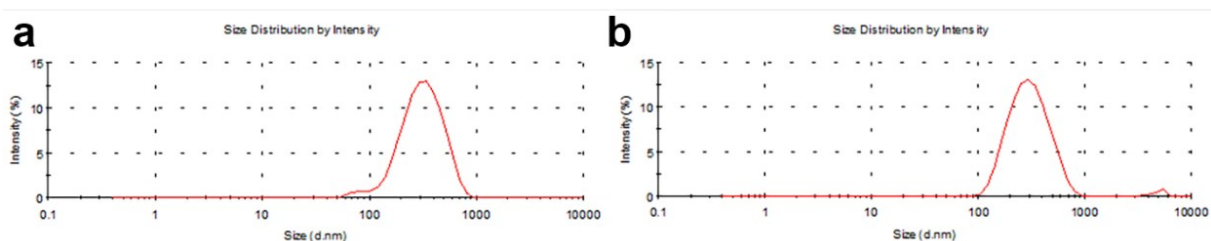

Fig. S2 Size distribution of BP NSs (a) and BP/PPy NSs (b), determined by dynamic light scattering (DLS).

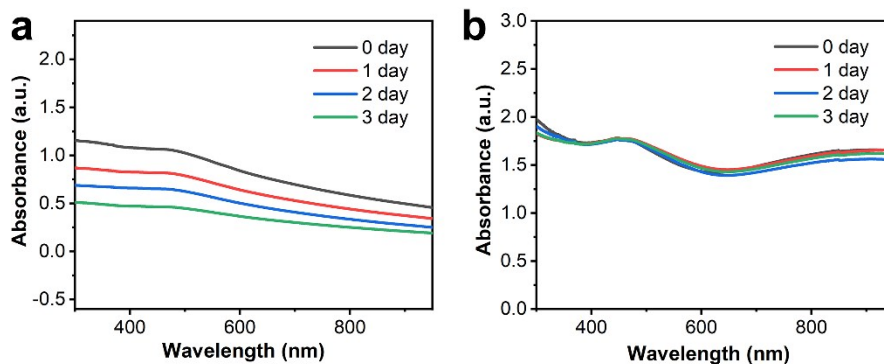

Fig. S3 The UV-Vis-NIR absorbance spectra of BP NSs (a) and BP/PPy NSs (b) during a 3-day observation.

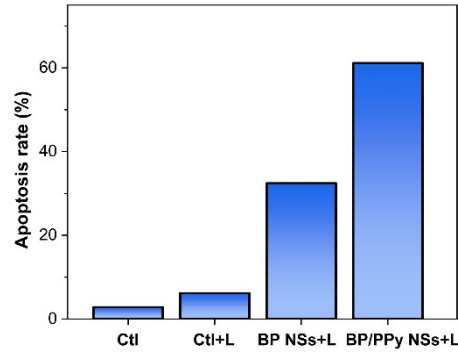

**Fig. S4** Apoptosis rate of 4T1 cells after NIR photothermal ablation.

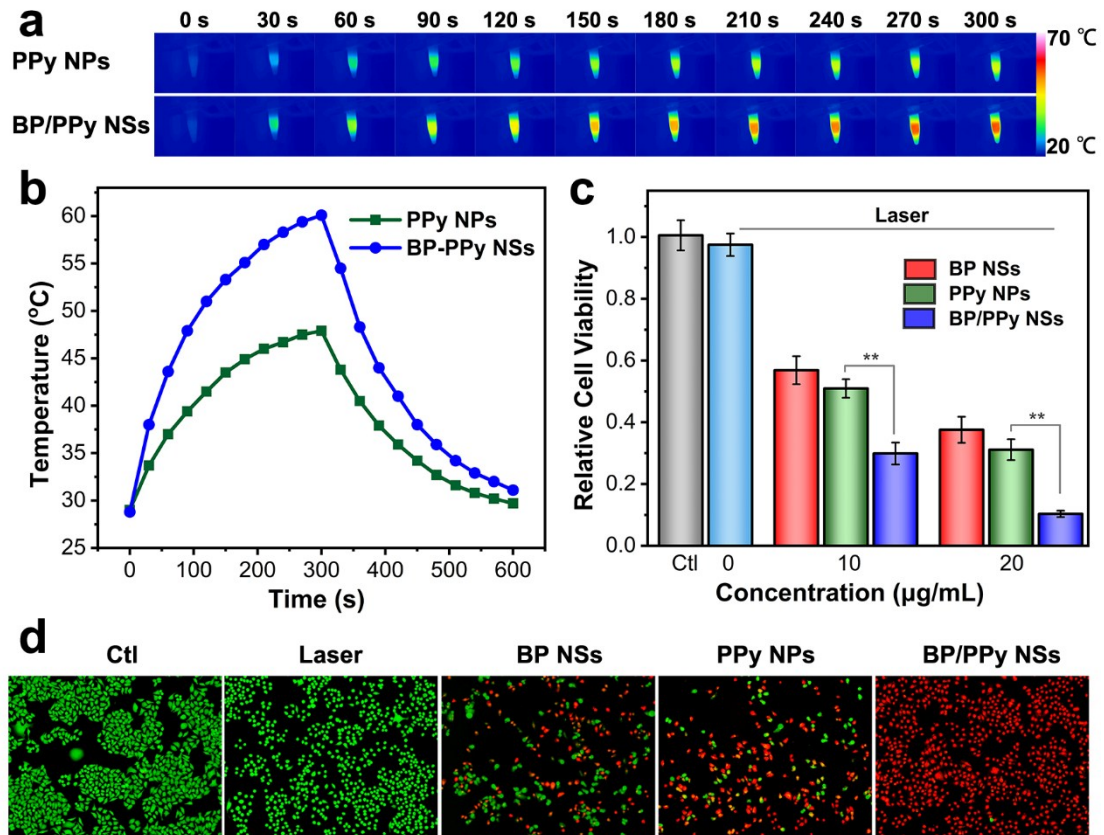

**Fig. S5** The comparative photothermal experiments between BP/PPy NSs and PPy NPs. a) The infrared thermal images of PPy NPs and BP/PPy NSs solutions (20 µg/mL) and b) their corresponding temperature curves. c) In vitro NIR photothermal effect of BP-based nanomaterials on cancer cells. Data are presented as mean ± SD, \*\*P < 0.01. d) Fluorescence photomicrographs of cancer cells stained with calcein AM (live cells, green fluorescence) and PI (dead cells, red fluorescence).
